# Supplementary material for: Biogeographical origin and timing of the founder ichthyosis TGM1 c.1187G > A mutation in an isolated Ecuadorian population
Source: PubMed Central journal article supplement (PMC6509209; doi:10.1038/s41598-019-43133-6), 2019-05-09
Supplement: 41598_2019_43133_MOESM3_ESM.pdf [file 41598_2019_43133_MOESM3_ESM.pdf]

**Table S2.** Markers used for the ancestral study.

| Chromosome | Start     | End       | N° of markers | N° of markers after LD filtering | Genes      |
|------------|-----------|-----------|---------------|----------------------------------|------------|
| chr1       | 35225291  | 35225439  | 8             | 3                                | GJB4       |
| chr1       | 35226483  | 35229375  | 156           | 48                               | GJB4       |
| chr1       | 35246739  | 35247429  | 13            | 4                                | GJB3       |
| chr1       | 35247828  | 35248093  | 10            | 4                                | GJB3       |
| chr1       | 35250288  | 35252020  | 74            | 25                               | GJB3       |
| chr1       | 152274600 | 152287273 | 1068          | 235                              | FLG        |
| chr1       | 152287744 | 152288003 | 6             | 0                                | FLG        |
| chr1       | 152297614 | 152297729 | 2             | 1                                | FLG        |
| chr1       | 153232125 | 153232259 | 3             | 0                                | LOR        |
| chr1       | 153233351 | 153234650 | 30            | 14                               | LOR        |
| chr1       | 155204188 | 155205685 | 41            | 14                               | GBA        |
| chr1       | 155205922 | 155206310 | 15            | 8                                | GBA        |
| chr1       | 155207081 | 155207419 | 5             | 0                                | GBA        |
| chr1       | 155207672 | 155208147 | 14            | 2                                | GBA        |
| chr1       | 155208257 | 155208732 | 10            | 4                                | GBA        |
| chr1       | 155209126 | 155209603 | 15            | 4                                | GBA        |
| chr1       | 155209626 | 155210140 | 16            | 4                                | GBA        |
| chr1       | 155210370 | 155210558 | 5             | 0                                | GBA        |
| chr1       | 155210826 | 155211119 | 9             | 3                                | GBA        |
| chr1       | 155213835 | 155214074 | 8             | 2                                | GBA        |
| chr1       | 155214246 | 155214703 | 18            | 7                                | GBA        |
| chr2       | 128014815 | 128015353 | 17            | 5                                | ERCC3      |
| chr2       | 128016821 | 128020508 | 104           | 36                               | ERCC3      |
| chr2       | 128028861 | 128029079 | 1             | 0                                | ERCC3      |
| chr2       | 128030390 | 128030587 | 4             | 1                                | ERCC3      |
| chr2       | 128036698 | 128037003 | 5             | 1                                | ERCC3      |
| chr2       | 128037972 | 128038257 | 11            | 2                                | ERCC3      |
| chr2       | 128044228 | 128044643 | 10            | 2                                | ERCC3      |
| chr2       | 128046185 | 128046490 | 11            | 3                                | ERCC3      |
| chr2       | 128046862 | 128048215 | 35            | 7                                | ERCC3      |
| chr2       | 128049960 | 128050472 | 14            | 6                                | ERCC3      |
| chr2       | 128051038 | 128051802 | 36            | 10                               | ERCC3      |
| chr2       | 159813999 | 159963000 | 4049          | 578                              | INTERGENIC |
| chr2       | 215796215 | 215797515 | 35            | 7                                | ABCA12     |
| chr2       | 215798751 | 215798989 | 6             | 2                                | ABCA12     |
| chr2       | 215802183 | 215802389 | 7             | 1                                | ABCA12     |
| chr2       | 215807598 | 215807791 | 5             | 2                                | ABCA12     |
| chr2       | 215809674 | 215809878 | 5             | 1                                | ABCA12     |
| chr2       | 215812095 | 215812330 | 1             | 1                                | ABCA12     |
| chr2       | 215813269 | 215813511 | 5             | 1                                | ABCA12     |
| chr2       | 215813713 | 215813923 | 7             | 3                                | ABCA12     |
| chr2       | 215815552 | 215815857 | 8             | 4                                | ABCA12     |
| chr2       | 215818527 | 215818881 | 10            | 3                                | ABCA12     |
| chr2       | 215819875 | 215820135 | 15            | 3                                | ABCA12     |
| chr2       | 215821336 | 215821552 | 5             | 1                                | ABCA12     |
| chr2       | 215822950 | 215823228 | 7             | 2                                | ABCA12     |
| chr2       | 215823697 | 215823852 | 7             | 1                                | ABCA12     |
| chr2       | 215831521 | 215831727 | 7             | 1                                | ABCA12     |
| chr2       | 215833393 | 215833581 | 5             | 1                                | ABCA12     |
| chr2       | 215834946 | 215835174 | 12            | 2                                | ABCA12     |

|      |           |           |    |    |            |
|------|-----------|-----------|----|----|------------|
| chr2 | 215838622 | 215838816 | 3  | 1  | ABCA12     |
| chr2 | 215839451 | 215839638 | 5  | 2  | ABCA12     |
| chr2 | 215840458 | 215840811 | 12 | 0  | ABCA12     |
| chr2 | 215842989 | 215843240 | 4  | 0  | ABCA12     |
| chr2 | 215843477 | 215843814 | 15 | 2  | ABCA12     |
| chr2 | 215845156 | 215845417 | 11 | 1  | ABCA12     |
| chr2 | 215846860 | 215847157 | 6  | 2  | ABCA12     |
| chr2 | 215848320 | 215848639 | 8  | 5  | ABCA12     |
| chr2 | 215851215 | 215851502 | 8  | 3  | ABCA12     |
| chr2 | 215852320 | 215852567 | 4  | 0  | ABCA12     |
| chr2 | 215854002 | 215854395 | 6  | 3  | ABCA12     |
| chr2 | 215855375 | 215855805 | 9  | 2  | ABCA12     |
| chr2 | 215862368 | 215862583 | 10 | 3  | ABCA12     |
| chr2 | 215865378 | 215865794 | 11 | 1  | ABCA12     |
| chr2 | 215866231 | 215866511 | 6  | 1  | ABCA12     |
| chr2 | 215868882 | 215869073 | 6  | 1  | ABCA12     |
| chr2 | 215872400 | 215872620 | 3  | 0  | ABCA12     |
| chr2 | 215875004 | 215875244 | 2  | 1  | ABCA12     |
| chr2 | 215876112 | 215876423 | 10 | 5  | ABCA12     |
| chr2 | 215876644 | 215876909 | 11 | 2  | ABCA12     |
| chr2 | 215880163 | 215880437 | 9  | 2  | ABCA12     |
| chr2 | 215882681 | 215882906 | 5  | 2  | ABCA12     |
| chr2 | 215884009 | 215884570 | 17 | 3  | ABCA12     |
| chr2 | 215890346 | 215890553 | 5  | 1  | ABCA12     |
| chr2 | 215891493 | 215891712 | 6  | 1  | ABCA12     |
| chr2 | 215896494 | 215896860 | 6  | 2  | ABCA12     |
| chr2 | 215901626 | 215901839 | 8  | 3  | ABCA12     |
| chr2 | 215910510 | 215910789 | 10 | 1  | ABCA12     |
| chr2 | 215914299 | 215914585 | 8  | 1  | ABCA12     |
| chr2 | 215917160 | 215917358 | 7  | 0  | ABCA12     |
| chr2 | 215919246 | 215919438 | 3  | 0  | ABCA12     |
| chr2 | 215928738 | 215928992 | 6  | 2  | ABCA12     |
| chr2 | 215940164 | 215940390 | 5  | 3  | ABCA12     |
| chr2 | 215976269 | 215976463 | 6  | 0  | ABCA12     |
| chr2 | 216002812 | 216003201 | 7  | 2  | ABCA12     |
| chr3 | 3742447   | 3744195   | 75 | 22 | INTERGENIC |
| chr3 | 3819358   | 3819537   | 7  | 2  | INTERGENIC |
| chr3 | 3820874   | 3821056   | 3  | 0  | INTERGENIC |
| chr3 | 3822985   | 3824435   | 65 | 26 | INTERGENIC |
| chr3 | 3830547   | 3830808   | 10 | 5  | INTERGENIC |
| chr3 | 3836872   | 3837162   | 11 | 4  | INTERGENIC |
| chr3 | 3839534   | 3839948   | 12 | 3  | INTERGENIC |
| chr3 | 3841345   | 3841630   | 5  | 3  | LRRN1      |
| chr3 | 3842334   | 3842609   | 7  | 4  | LRRN1      |
| chr3 | 3864367   | 3864631   | 11 | 1  | LRRN1      |
| chr3 | 3868875   | 3869243   | 9  | 2  | LRRN1      |
| chr3 | 4046822   | 4046930   | 3  | 1  | INTERGENIC |
| chr3 | 4110202   | 4110479   | 9  | 5  | INTERGENIC |
| chr3 | 4270943   | 4271082   | 7  | 3  | INTERGENIC |
| chr3 | 4402778   | 4403988   | 62 | 28 | SUMF1      |
| chr3 | 4417963   | 4418123   | 6  | 3  | SUMF1      |
| chr3 | 4452498   | 4452712   | 7  | 1  | SUMF1      |
| chr3 | 4458761   | 4458976   | 2  | 1  | SUMF1      |

|      |           |           |     |    |        |
|------|-----------|-----------|-----|----|--------|
| chr3 | 4459643   | 4459866   | 10  | 2  | SUMF1  |
| chr3 | 4461697   | 4461880   | 10  | 3  | SUMF1  |
| chr3 | 4490899   | 4491074   | 6   | 2  | SUMF1  |
| chr3 | 4494509   | 4494783   | 8   | 1  | SUMF1  |
| chr3 | 4508609   | 4509016   | 19  | 8  | SUMF1  |
| chr3 | 43731554  | 43731744  | 3   | 1  | ABHD5  |
| chr3 | 43731822  | 43732252  | 18  | 3  | ABHD5  |
| chr3 | 43732311  | 43732581  | 21  | 9  | ABHD5  |
| chr3 | 43732698  | 43733051  | 8   | 4  | ABHD5  |
| chr3 | 43740717  | 43741287  | 13  | 4  | ABHD5  |
| chr3 | 43743353  | 43743550  | 4   | 1  | ABHD5  |
| chr3 | 43743656  | 43744129  | 16  | 2  | ABHD5  |
| chr3 | 43753148  | 43753406  | 8   | 1  | ABHD5  |
| chr3 | 43756388  | 43756600  | 4   | 1  | ABHD5  |
| chr3 | 43759109  | 43759399  | 5   | 0  | ABHD5  |
| chr3 | 43759884  | 43764267  | 115 | 21 | ABHD5  |
| chr3 | 43775491  | 43775913  | 19  | 2  | ABHD5  |
| chr3 | 190023439 | 190026278 | 85  | 28 | CLDN1  |
| chr3 | 190027907 | 190028092 | 5   | 1  | CLDN1  |
| chr3 | 190030610 | 190031057 | 21  | 4  | CLDN1  |
| chr3 | 190039722 | 190040314 | 22  | 10 | CLDN1  |
| chr5 | 147405195 | 147405399 | 6   | 2  | SPINK5 |
| chr5 | 147443375 | 147443712 | 14  | 4  | SPINK5 |
| chr5 | 147444859 | 147445088 | 9   | 1  | SPINK5 |
| chr5 | 147449835 | 147450063 | 6   | 2  | SPINK5 |
| chr5 | 147451660 | 147451833 | 4   | 1  | SPINK5 |
| chr5 | 147465917 | 147466145 | 7   | 0  | SPINK5 |
| chr5 | 147468054 | 147468218 | 3   | 0  | SPINK5 |
| chr5 | 147468531 | 147468706 | 3   | 1  | SPINK5 |
| chr5 | 147468729 | 147468885 | 2   | 0  | SPINK5 |
| chr5 | 147469006 | 147469234 | 8   | 4  | SPINK5 |
| chr5 | 147470165 | 147470313 | 4   | 0  | SPINK5 |
| chr5 | 147470440 | 147470658 | 6   | 2  | SPINK5 |
| chr5 | 147470677 | 147470841 | 5   | 1  | SPINK5 |
| chr5 | 147473866 | 147474094 | 10  | 5  | SPINK5 |
| chr5 | 147475330 | 147475518 | 5   | 0  | SPINK5 |
| chr5 | 147477379 | 147477616 | 6   | 2  | SPINK5 |
| chr5 | 147478746 | 147478928 | 5   | 0  | SPINK5 |
| chr5 | 147479966 | 147480194 | 10  | 2  | SPINK5 |
| chr5 | 147480867 | 147481049 | 9   | 1  | SPINK5 |
| chr5 | 147481293 | 147481521 | 11  | 4  | SPINK5 |
| chr5 | 147484464 | 147484613 | 7   | 4  | SPINK5 |
| chr5 | 147486549 | 147486777 | 12  | 3  | SPINK5 |
| chr5 | 147488265 | 147488450 | 3   | 1  | SPINK5 |
| chr5 | 147491280 | 147491508 | 8   | 3  | SPINK5 |
| chr5 | 147492380 | 147492547 | 6   | 1  | SPINK5 |
| chr5 | 147493874 | 147494102 | 8   | 0  | SPINK5 |
| chr5 | 147495882 | 147496079 | 8   | 3  | SPINK5 |
| chr5 | 147497949 | 147498177 | 6   | 2  | SPINK5 |
| chr5 | 147498498 | 147498671 | 8   | 4  | SPINK5 |
| chr5 | 147499521 | 147499749 | 9   | 3  | SPINK5 |
| chr5 | 147499807 | 147500004 | 6   | 0  | SPINK5 |
| chr5 | 147503345 | 147503573 | 6   | 2  | SPINK5 |

|      |           |           |     |    |         |
|------|-----------|-----------|-----|----|---------|
| chr5 | 147504277 | 147504553 | 11  | 5  | SPINK5  |
| chr5 | 147505036 | 147505226 | 7   | 1  | SPINK5  |
| chr5 | 147505235 | 147505463 | 7   | 2  | SPINK5  |
| chr5 | 147506495 | 147506692 | 5   | 1  | SPINK5  |
| chr5 | 147510771 | 147511002 | 7   | 0  | SPINK5  |
| chr5 | 147513309 | 147513500 | 6   | 3  | SPINK5  |
| chr5 | 147516495 | 147516975 | 14  | 4  | SPINK5  |
| chr5 | 156886976 | 156887637 | 23  | 9  | NIPAL4  |
| chr5 | 156890051 | 156890391 | 15  | 4  | NIPAL4  |
| chr5 | 156894006 | 156894163 | 5   | 3  | NIPAL4  |
| chr5 | 156894214 | 156895026 | 22  | 9  | NIPAL4  |
| chr5 | 156895679 | 156895870 | 10  | 3  | NIPAL4  |
| chr5 | 156898614 | 156898875 | 8   | 1  | NIPAL4  |
| chr5 | 156899289 | 156901780 | 65  | 17 | NIPAL4  |
| chr6 | 36210894  | 36211088  | 4   | 2  | PNPLA1  |
| chr6 | 36238186  | 36238491  | 13  | 1  | PNPLA1  |
| chr6 | 36259046  | 36259382  | 19  | 10 | PNPLA1  |
| chr6 | 36260787  | 36260953  | 11  | 3  | PNPLA1  |
| chr6 | 36261889  | 36262226  | 11  | 3  | PNPLA1  |
| chr6 | 36263090  | 36263251  | 6   | 4  | PNPLA1  |
| chr6 | 36269587  | 36270296  | 33  | 8  | PNPLA1  |
| chr6 | 36274018  | 36274203  | 7   | 3  | PNPLA1  |
| chr6 | 36275313  | 36276422  | 37  | 19 | PNPLA1  |
| chr6 | 137143651 | 137143983 | 10  | 6  | PEX7    |
| chr6 | 137146301 | 137146459 | 2   | 1  | PEX7    |
| chr6 | 137147406 | 137147657 | 8   | 2  | PEX7    |
| chr6 | 137151094 | 137151448 | 6   | 4  | PEX7    |
| chr6 | 137166702 | 137166880 | 3   | 2  | PEX7    |
| chr6 | 137167160 | 137167369 | 4   | 1  | PEX7    |
| chr6 | 137187714 | 137187921 | 4   | 1  | PEX7    |
| chr6 | 137190977 | 137191191 | 5   | 2  | PEX7    |
| chr6 | 137191819 | 137192027 | 3   | 1  | PEX7    |
| chr6 | 137193285 | 137193441 | 2   | 2  | PEX7    |
| chr6 | 137219229 | 137219429 | 5   | 2  | PEX7    |
| chr6 | 137234545 | 137235122 | 17  | 6  | PEX7    |
| chr6 | 158589328 | 158589477 | 15  | 3  | GTF2H5  |
| chr6 | 158591451 | 158591620 | 5   | 1  | GTF2H5  |
| chr6 | 158612958 | 158620426 | 228 | 63 | GTF2H5  |
| chr7 | 40172291  | 40172908  | 13  | 4  | MPLKIP  |
| chr7 | 40173777  | 40174308  | 15  | 4  | MPLKIP  |
| chr7 | 100797627 | 100797983 | 21  | 9  | AP1S1   |
| chr7 | 100799824 | 100800103 | 6   | 3  | AP1S1   |
| chr7 | 100800607 | 100800816 | 7   | 2  | AP1S1   |
| chr7 | 100802289 | 100802527 | 9   | 3  | AP1S1   |
| chr7 | 100803749 | 100804608 | 27  | 8  | AP1S1   |
| chr7 | 100804722 | 100804927 | 5   | 3  | AP1S1   |
| chr9 | 131102788 | 131103167 | 13  | 5  | SLC27A4 |
| chr9 | 131105355 | 131105622 | 8   | 1  | SLC27A4 |
| chr9 | 131107383 | 131107878 | 19  | 8  | SLC27A4 |
| chr9 | 131110773 | 131111032 | 6   | 3  | SLC27A4 |
| chr9 | 131112540 | 131112710 | 7   | 3  | SLC27A4 |
| chr9 | 131112712 | 131112904 | 6   | 1  | SLC27A4 |
| chr9 | 131114866 | 131115076 | 4   | 1  | SLC27A4 |

|       |           |           |    |    |         |
|-------|-----------|-----------|----|----|---------|
| chr9  | 131115253 | 131115563 | 9  | 7  | SLC27A4 |
| chr9  | 131115643 | 131115870 | 6  | 0  | SLC27A4 |
| chr9  | 131117281 | 131117519 | 3  | 1  | SLC27A4 |
| chr9  | 131117626 | 131118125 | 19 | 5  | SLC27A4 |
| chr9  | 131122562 | 131123799 | 36 | 14 | SLC27A4 |
| chr10 | 13319745  | 13320404  | 17 | 5  | PHYH    |
| chr10 | 13322925  | 13323160  | 8  | 1  | PHYH    |
| chr10 | 13325639  | 13325889  | 7  | 2  | PHYH    |
| chr10 | 13330309  | 13330591  | 13 | 3  | PHYH    |
| chr10 | 13333410  | 13333962  | 18 | 10 | PHYH    |
| chr10 | 13336377  | 13337037  | 27 | 8  | PHYH    |
| chr10 | 13337177  | 13337656  | 15 | 4  | PHYH    |
| chr10 | 13340136  | 13340295  | 8  | 4  | PHYH    |
| chr10 | 13341369  | 13341813  | 21 | 8  | PHYH    |
| chr10 | 13341917  | 13342180  | 6  | 3  | PHYH    |
| chr10 | 13343935  | 13344462  | 13 | 5  | PHYH    |
| chr10 | 90519901  | 90520057  | 5  | 2  | LIPN    |
| chr10 | 90521104  | 90521320  | 1  | 0  | LIPN    |
| chr10 | 90521894  | 90522112  | 5  | 1  | LIPN    |
| chr10 | 90524116  | 90524415  | 8  | 3  | LIPN    |
| chr10 | 90525975  | 90526185  | 3  | 1  | LIPN    |
| chr10 | 90528498  | 90528735  | 11 | 5  | LIPN    |
| chr10 | 90530551  | 90530798  | 9  | 4  | LIPN    |
| chr10 | 90534179  | 90534351  | 2  | 2  | LIPN    |
| chr10 | 90534798  | 90534970  | 7  | 4  | LIPN    |
| chr10 | 90537715  | 90538049  | 14 | 7  | LIPN    |
| chr11 | 130029406 | 130030139 | 18 | 7  | ST14    |
| chr11 | 130057958 | 130058218 | 11 | 4  | ST14    |
| chr11 | 130058374 | 130058602 | 9  | 8  | ST14    |
| chr11 | 130058713 | 130058884 | 7  | 2  | ST14    |
| chr11 | 130059169 | 130059841 | 27 | 12 | ST14    |
| chr11 | 130059885 | 130060639 | 32 | 11 | ST14    |
| chr11 | 130063993 | 130064233 | 10 | 3  | ST14    |
| chr11 | 130064484 | 130064682 | 10 | 4  | ST14    |
| chr11 | 130066183 | 130066393 | 11 | 3  | ST14    |
| chr11 | 130066414 | 130066739 | 12 | 3  | ST14    |
| chr11 | 130067685 | 130067890 | 12 | 5  | ST14    |
| chr11 | 130068152 | 130068566 | 24 | 9  | ST14    |
| chr11 | 130068791 | 130069014 | 11 | 3  | ST14    |
| chr11 | 130069795 | 130070082 | 8  | 2  | ST14    |
| chr11 | 130078254 | 130078629 | 12 | 3  | ST14    |
| chr11 | 130079286 | 130080406 | 35 | 13 | ST14    |
| chr12 | 53038291  | 53039403  | 47 | 18 | KRT2    |
| chr12 | 53040473  | 53040794  | 13 | 3  | KRT2    |
| chr12 | 53041463  | 53041689  | 7  | 2  | KRT2    |
| chr12 | 53041906  | 53042171  | 12 | 4  | KRT2    |
| chr12 | 53042740  | 53042936  | 11 | 4  | KRT2    |
| chr12 | 53043647  | 53043808  | 6  | 2  | KRT2    |
| chr12 | 53044072  | 53044506  | 12 | 1  | KRT2    |
| chr12 | 53045291  | 53046009  | 32 | 13 | KRT2    |
| chr12 | 53068469  | 53069578  | 48 | 12 | KRT1    |
| chr12 | 53070008  | 53070329  | 14 | 4  | KRT1    |
| chr12 | 53070792  | 53071018  | 5  | 2  | KRT1    |

|       |          |          |    |    |        |
|-------|----------|----------|----|----|--------|
| chr12 | 53071049 | 53071351 | 9  | 2  | KRT1   |
| chr12 | 53071383 | 53071579 | 4  | 1  | KRT1   |
| chr12 | 53071896 | 53072057 | 5  | 0  | KRT1   |
| chr12 | 53072275 | 53072590 | 6  | 2  | KRT1   |
| chr12 | 53073491 | 53074241 | 32 | 13 | KRT1   |
| chr13 | 20761553 | 20763969 | 99 | 32 | GJB2   |
| chr13 | 20766871 | 20767164 | 6  | 5  | GJB2   |
| chr13 | 20796050 | 20797684 | 56 | 17 | GJB6   |
| chr13 | 20803668 | 20803938 | 8  | 3  | GJB6   |
| chr13 | 20804786 | 20805422 | 21 | 9  | GJB6   |
| chr13 | 20805470 | 20805694 | 4  | 2  | GJB6   |
| chr13 | 20806282 | 20806584 | 6  | 4  | GJB6   |
| chr13 | 29233090 | 29233374 | 17 | 5  | POMP   |
| chr13 | 29233908 | 29234106 | 6  | 3  | POMP   |
| chr13 | 29236496 | 29236694 | 5  | 1  | POMP   |
| chr13 | 29238595 | 29238756 | 1  | 0  | POMP   |
| chr13 | 29242559 | 29242761 | 6  | 1  | POMP   |
| chr13 | 29246425 | 29246619 | 5  | 0  | POMP   |
| chr13 | 29252121 | 29253143 | 26 | 4  | POMP   |
| chr14 | 24718269 | 24718797 | 13 | 7  | TGM1   |
| chr14 | 24723278 | 24723544 | 11 | 3  | TGM1   |
| chr14 | 24723819 | 24724080 | 9  | 6  | TGM1   |
| chr14 | 24724127 | 24724509 | 13 | 3  | TGM1   |
| chr14 | 24724519 | 24724773 | 12 | 5  | TGM1   |
| chr14 | 24725144 | 24725333 | 4  | 0  | TGM1   |
| chr14 | 24727440 | 24727644 | 4  | 1  | TGM1   |
| chr14 | 24727690 | 24727929 | 9  | 4  | TGM1   |
| chr14 | 24728230 | 24728505 | 12 | 5  | TGM1   |
| chr14 | 24728859 | 24729067 | 10 | 3  | TGM1   |
| chr14 | 24729095 | 24729414 | 13 | 7  | TGM1   |
| chr14 | 24729605 | 24729954 | 18 | 1  | TGM1   |
| chr14 | 24730850 | 24731139 | 21 | 10 | TGM1   |
| chr14 | 24731189 | 24731610 | 28 | 12 | TGM1   |
| chr14 | 24732244 | 24732796 | 24 | 10 | TGM1   |
| chr14 | 24733089 | 24733688 | 15 | 6  | TGM1   |
| chr15 | 91541595 | 91542334 | 27 | 8  | VPS33B |
| chr15 | 91542510 | 91543073 | 20 | 4  | VPS33B |
| chr15 | 91543079 | 91543255 | 3  | 2  | VPS33B |
| chr15 | 91543669 | 91544285 | 16 | 8  | VPS33B |
| chr15 | 91544568 | 91544742 | 1  | 1  | VPS33B |
| chr15 | 91545229 | 91545462 | 8  | 2  | VPS33B |
| chr15 | 91546264 | 91546411 | 3  | 1  | VPS33B |
| chr15 | 91548056 | 91548211 | 5  | 1  | VPS33B |
| chr15 | 91548234 | 91548399 | 6  | 0  | VPS33B |
| chr15 | 91548559 | 91548734 | 6  | 4  | VPS33B |
| chr15 | 91548873 | 91549064 | 7  | 2  | VPS33B |
| chr15 | 91549152 | 91549339 | 7  | 2  | VPS33B |
| chr15 | 91549551 | 91550326 | 28 | 10 | VPS33B |
| chr15 | 91550648 | 91550853 | 6  | 1  | VPS33B |
| chr15 | 91551049 | 91551244 | 6  | 0  | VPS33B |
| chr15 | 91552980 | 91553126 | 3  | 0  | VPS33B |
| chr15 | 91556951 | 91557151 | 9  | 3  | VPS33B |
| chr15 | 91557563 | 91557713 | 5  | 3  | VPS33B |

|       |           |           |    |    |         |
|-------|-----------|-----------|----|----|---------|
| chr15 | 91560142  | 91560344  | 7  | 3  | VPS33B  |
| chr15 | 91560984  | 91561165  | 5  | 0  | VPS33B  |
| chr15 | 91561197  | 91561316  | 2  | 1  | VPS33B  |
| chr15 | 91565333  | 91565883  | 20 | 7  | VPS33B  |
| chr15 | 100940549 | 100943120 | 93 | 29 | CERS3   |
| chr15 | 100996047 | 100996301 | 11 | 7  | CERS3   |
| chr15 | 101009532 | 101009739 | 7  | 2  | CERS3   |
| chr15 | 101013078 | 101013307 | 11 | 5  | CERS3   |
| chr15 | 101015991 | 101016433 | 12 | 3  | CERS3   |
| chr15 | 101019582 | 101019751 | 4  | 1  | CERS3   |
| chr15 | 101020143 | 101020301 | 0  | 0  | CERS3   |
| chr15 | 101024704 | 101024923 | 10 | 2  | CERS3   |
| chr15 | 101030926 | 101031186 | 8  | 5  | CERS3   |
| chr15 | 101040402 | 101040759 | 10 | 3  | CERS3   |
| chr15 | 101041831 | 101042105 | 16 | 4  | CERS3   |
| chr15 | 101043864 | 101044103 | 10 | 4  | CERS3   |
| chr15 | 101061821 | 101062011 | 2  | 1  | CERS3   |
| chr15 | 101068967 | 101069520 | 15 | 10 | CERS3   |
| chr15 | 101084278 | 101084668 | 15 | 8  | CERS3   |
| chr15 | 101084805 | 101084975 | 7  | 2  | CERS3   |
| chr15 | 101085057 | 101085250 | 11 | 3  | CERS3   |
| chr17 | 7975903   | 7976318   | 8  | 5  | ALOX12B |
| chr17 | 7976415   | 7976686   | 5  | 1  | ALOX12B |
| chr17 | 7976924   | 7977125   | 6  | 3  | ALOX12B |
| chr17 | 7978862   | 7979084   | 7  | 5  | ALOX12B |
| chr17 | 7979442   | 7979712   | 11 | 3  | ALOX12B |
| chr17 | 7979924   | 7980111   | 1  | 0  | ALOX12B |
| chr17 | 7980257   | 7980561   | 13 | 6  | ALOX12B |
| chr17 | 7982663   | 7982907   | 6  | 3  | ALOX12B |
| chr17 | 7983036   | 7983463   | 10 | 5  | ALOX12B |
| chr17 | 7983502   | 7983706   | 9  | 1  | ALOX12B |
| chr17 | 7983925   | 7984148   | 5  | 2  | ALOX12B |
| chr17 | 7984151   | 7984344   | 12 | 3  | ALOX12B |
| chr17 | 7984373   | 7984555   | 5  | 2  | ALOX12B |
| chr17 | 7989283   | 7989588   | 13 | 6  | ALOX12B |
| chr17 | 7990563   | 7991072   | 20 | 8  | ALOX12B |
| chr17 | 7999167   | 8000174   | 40 | 14 | ALOXE3  |
| chr17 | 8006590   | 8006883   | 10 | 2  | ALOXE3  |
| chr17 | 8007382   | 8007583   | 4  | 2  | ALOXE3  |
| chr17 | 8011735   | 8011957   | 7  | 0  | ALOXE3  |
| chr17 | 8012441   | 8012711   | 9  | 4  | ALOXE3  |
| chr17 | 8013183   | 8013896   | 23 | 4  | ALOXE3  |
| chr17 | 8014626   | 8014899   | 8  | 1  | ALOXE3  |
| chr17 | 8015360   | 8015564   | 4  | 1  | ALOXE3  |
| chr17 | 8017751   | 8017977   | 15 | 3  | ALOXE3  |
| chr17 | 8018205   | 8018425   | 7  | 3  | ALOXE3  |
| chr17 | 8018874   | 8019056   | 3  | 3  | ALOXE3  |
| chr17 | 8020043   | 8020348   | 13 | 3  | ALOXE3  |
| chr17 | 8021111   | 8021910   | 17 | 9  | ALOXE3  |
| chr17 | 8021963   | 8022415   | 19 | 7  | ALOXE3  |
| chr17 | 19551398  | 19551628  | 5  | 3  | ALDH3A2 |
| chr17 | 19551788  | 19552487  | 28 | 10 | ALDH3A2 |
| chr17 | 19554809  | 19555141  | 8  | 0  | ALDH3A2 |

|       |          |          |    |    |         |
|-------|----------|----------|----|----|---------|
| chr17 | 19555809 | 19556060 | 8  | 1  | ALDH3A2 |
| chr17 | 19558543 | 19558750 | 3  | 1  | ALDH3A2 |
| chr17 | 19559407 | 19559937 | 17 | 4  | ALDH3A2 |
| chr17 | 19560983 | 19561225 | 4  | 1  | ALDH3A2 |
| chr17 | 19562835 | 19563062 | 8  | 6  | ALDH3A2 |
| chr17 | 19564389 | 19564805 | 10 | 2  | ALDH3A2 |
| chr17 | 19566595 | 19566865 | 5  | 2  | ALDH3A2 |
| chr17 | 19568210 | 19568410 | 8  | 2  | ALDH3A2 |
| chr17 | 19574983 | 19575319 | 6  | 1  | ALDH3A2 |
| chr17 | 19575614 | 19575794 | 3  | 3  | ALDH3A2 |
| chr17 | 19576413 | 19576638 | 6  | 0  | ALDH3A2 |
| chr17 | 19577346 | 19580961 | 81 | 20 | ALDH3A2 |
| chr17 | 38974318 | 38974784 | 14 | 6  | KRT10   |
| chr17 | 38974988 | 38975463 | 15 | 6  | KRT10   |
| chr17 | 38975718 | 38976093 | 6  | 2  | KRT10   |
| chr17 | 38976250 | 38976969 | 15 | 3  | KRT10   |
| chr17 | 38977236 | 38977419 | 4  | 0  | KRT10   |
| chr17 | 38978160 | 38978913 | 28 | 9  | KRT10   |
| chr19 | 15619285 | 15619444 | 4  | 3  | CYP4F22 |
| chr19 | 15634453 | 15634660 | 4  | 2  | CYP4F22 |
| chr19 | 15636093 | 15636419 | 19 | 9  | CYP4F22 |
| chr19 | 15640469 | 15640714 | 9  | 2  | CYP4F22 |
| chr19 | 15648121 | 15648275 | 7  | 3  | CYP4F22 |
| chr19 | 15648295 | 15648523 | 8  | 4  | CYP4F22 |
| chr19 | 15648632 | 15648854 | 11 | 4  | CYP4F22 |
| chr19 | 15651210 | 15651578 | 24 | 8  | CYP4F22 |
| chr19 | 15654731 | 15654898 | 5  | 1  | CYP4F22 |
| chr19 | 15654910 | 15655140 | 2  | 0  | CYP4F22 |
| chr19 | 15658868 | 15659102 | 10 | 3  | CYP4F22 |
| chr19 | 15659898 | 15660063 | 5  | 2  | CYP4F22 |
| chr19 | 15661434 | 15661617 | 2  | 2  | CYP4F22 |
| chr19 | 15662054 | 15663178 | 33 | 15 | CYP4F22 |
| chr19 | 45854195 | 45855029 | 64 | 21 | ERCC2   |
| chr19 | 45855416 | 45855660 | 19 | 5  | ERCC2   |
| chr19 | 45855713 | 45856124 | 24 | 4  | ERCC2   |
| chr19 | 45856290 | 45856642 | 20 | 6  | ERCC2   |
| chr19 | 45857937 | 45858159 | 10 | 2  | ERCC2   |
| chr19 | 45858872 | 45859036 | 5  | 1  | ERCC2   |
| chr19 | 45860477 | 45860679 | 8  | 1  | ERCC2   |
| chr19 | 45860681 | 45861007 | 11 | 2  | ERCC2   |
| chr19 | 45861972 | 45862220 | 16 | 5  | ERCC2   |
| chr19 | 45864731 | 45864950 | 9  | 3  | ERCC2   |
| chr19 | 45866950 | 45867427 | 19 | 4  | ERCC2   |
| chr19 | 45867442 | 45867855 | 19 | 7  | ERCC2   |
| chr19 | 45868045 | 45868466 | 14 | 5  | ERCC2   |
| chr19 | 45871837 | 45872051 | 9  | 1  | ERCC2   |
| chr19 | 45872137 | 45872455 | 8  | 2  | ERCC2   |
| chr19 | 45873340 | 45873926 | 20 | 5  | ERCC2   |
| chr22 | 21213220 | 21213685 | 26 | 7  | SNAP29  |
| chr22 | 21213720 | 21213978 | 6  | 2  | SNAP29  |
| chr22 | 21224574 | 21225379 | 21 | 7  | SNAP29  |
| chr22 | 21235286 | 21235472 | 5  | 2  | SNAP29  |
| chr22 | 21237708 | 21237907 | 3  | 0  | SNAP29  |

|       |          |          |     |    |        |
|-------|----------|----------|-----|----|--------|
| chr22 | 21241916 | 21245552 | 132 | 38 | SNAP29 |
|-------|----------|----------|-----|----|--------|
